# Supplementary material for: Cardiac power output accurately reflects external cardiac work over a wide range of inotropic states in pigs
Source: Springer Nature journal article supplement (doi:10.1186/s12872-019-1212-2), 2019-10-15

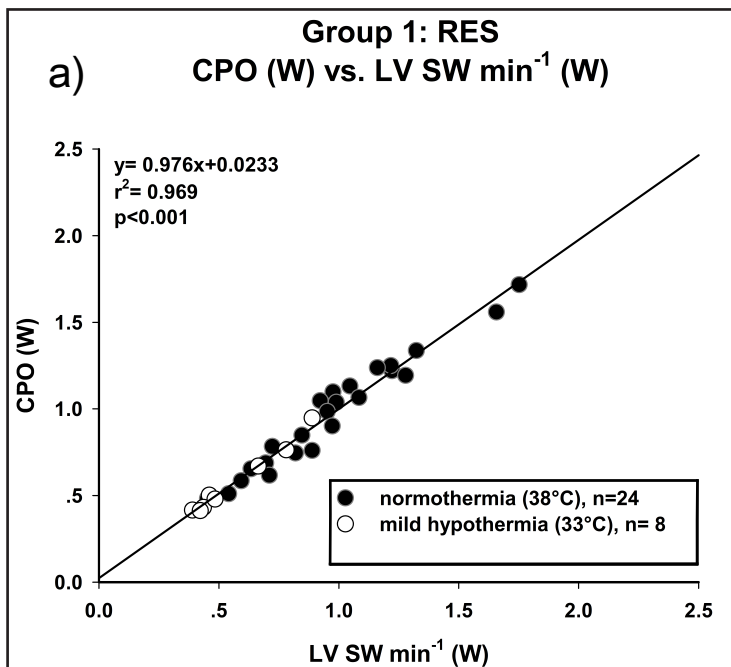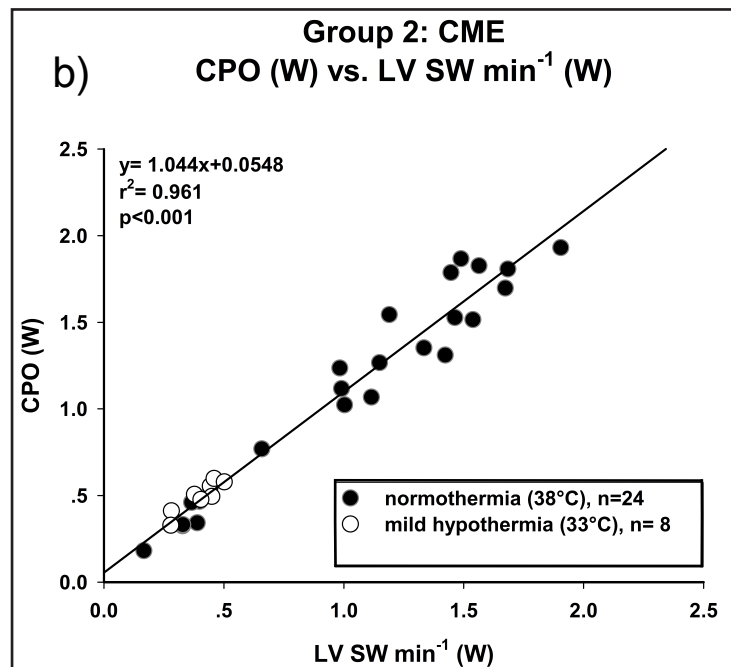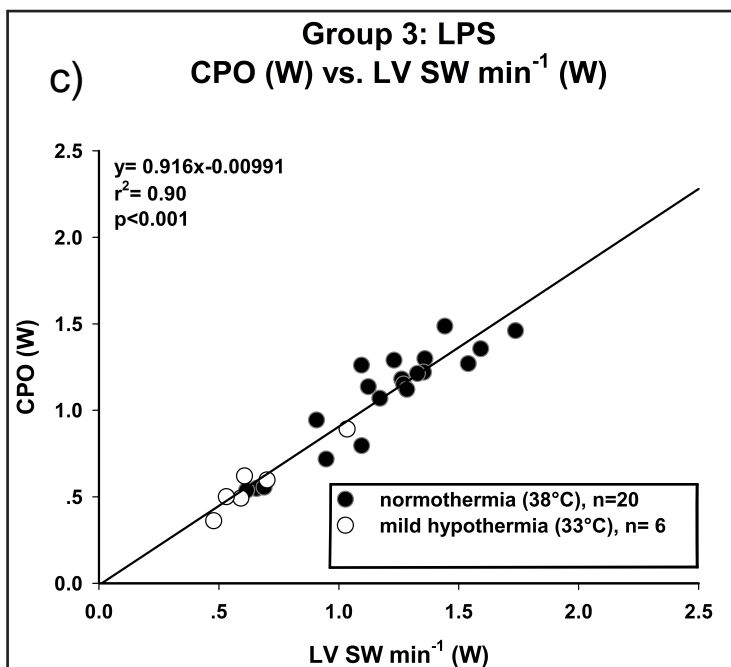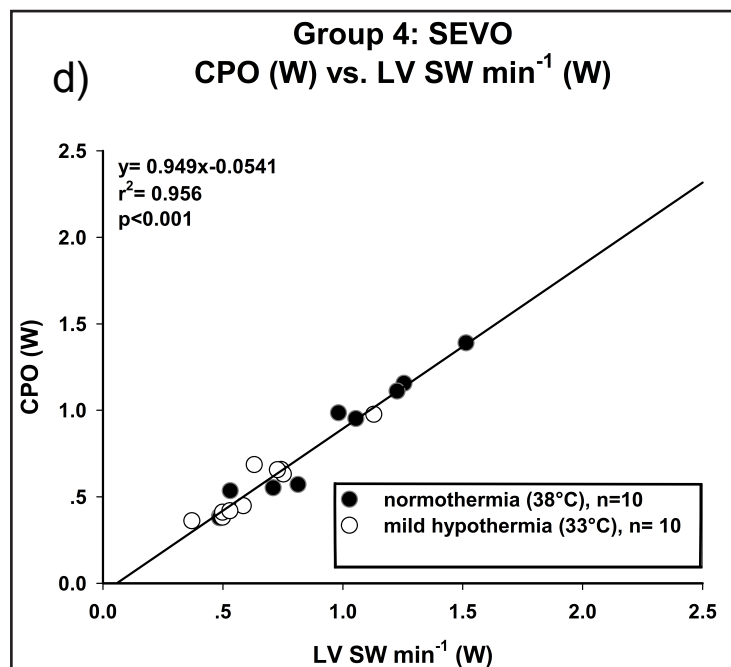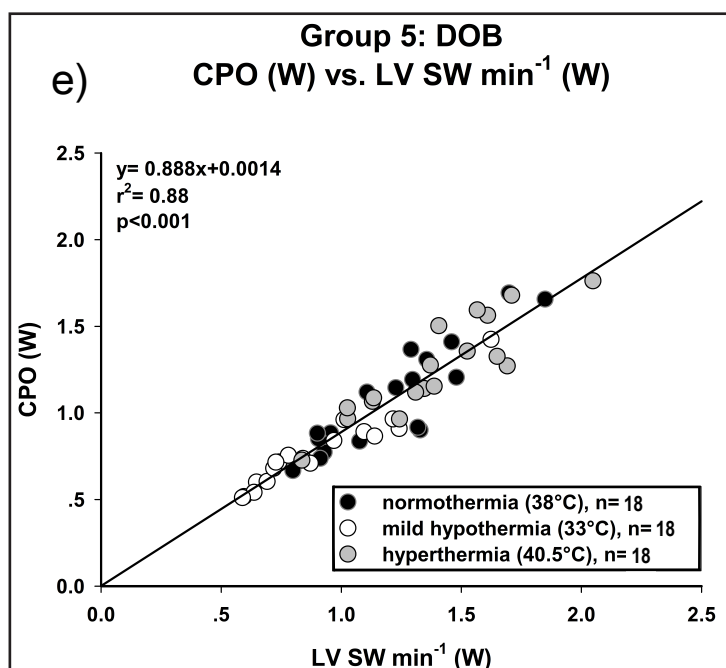

Supplement: MOESM1 [file 17274826]
